# Supplementary material
Source: PubMed Central journal article supplement (PMC7755433)
Supplement: CONC-27-e656-S001.pdf [file CONC-27-e656-S001.pdf]

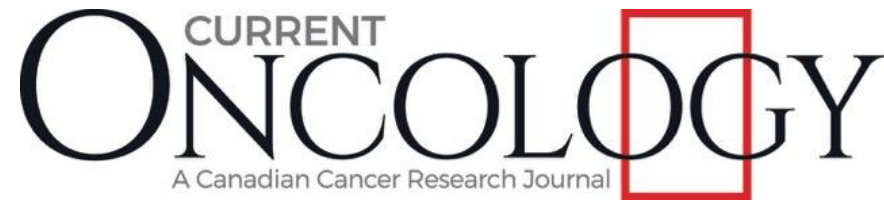

## **Supplemental Materials for**

### **Prognostic Ability of PD-L1 Levels in Urothelial Carcinoma Patients– A meta-analysis**

J Huang, MD, X Teng, MD

#### **List of supplementary files:**

**Supplementary table 2**

**Supplementary table 3**

#### **Corresponding author**

Dr Xiaodong Teng

Department of Pathology

The First Affiliated Hospital,

College of Medicine, Zhejiang University

79 Qingchun Road, Hangzhou, China.

E-mail ID: [teng.xiaodong@yahoo.com](mailto:teng.xiaodong@yahoo.com)

Telephone: 86-13867484836

**Supplementary table 2. PD-L1 testing methodology and prevalence of PD-L1 in the included studies.**

| S.No. | Author          | Year | PD-L1 Assay developer | Antibody clone used for IHC | Target cell population<br>Tumor cell (TC)/<br>Immune cell (IC) | Expression threshold of PDL1 | PD-L1 positive | PD-L1 negative |
|-------|-----------------|------|-----------------------|-----------------------------|----------------------------------------------------------------|------------------------------|----------------|----------------|
| 1     | Balar AV        | 2017 | Agilent               | 22C3                        | TC and IC                                                      | 10%                          | 30%            | 70%            |
|       |                 |      |                       |                             |                                                                | 1%                           | 83%            | 17%            |
| 2     | Sharma P        | 2017 | Dako                  | 28-8                        | TC                                                             | 1%                           | 46%            | 54%            |
|       |                 |      |                       |                             |                                                                | 5%                           | 31%            | 69%            |
| 3     | Pal SK          | 2018 | Ventana               | SP142                       | IC                                                             | 5%                           | 52%            | 48%            |
| 4     | Plimack ER      | 2017 | Dako                  | 22C3                        | TC and IC                                                      | 1%                           | 84%            | 16%            |
| 5     | Sharma P        | 2016 | Dako                  | 28-8                        | TC                                                             | 1%                           | 37%            | 63%            |
| 6     | Perez-Gracia JL | 2017 | Ventana               | SP142                       | IC                                                             | 1%                           | 67%            | 33%            |
|       |                 |      |                       |                             |                                                                | 5%                           | 32%            | 68%            |
| 7     | Petrylak        | 2018 | Ventana               | SPI142                      | IC                                                             | 5%                           | 53%            | 7%             |

|    |               |      |         |        |          |     |     |     |
|----|---------------|------|---------|--------|----------|-----|-----|-----|
| 8  | Powles        | 2017 | Ventana | SP-263 | IC or TC | 25% | 55% | 45% |
| 9  | Apolo         | 2018 | Dako    | 73-10  | TC       | 5%  | 45% | 55% |
| 10 | Balar et al., | 2017 | Ventana | SPI142 | IC       | 1%  | 67% | 33% |
|    |               |      |         |        |          | 5%  | 27% | 73% |

**Supplementary table 3. Diagnostic characteristics of the 3 PD-L1 thresholds.**

| <b>Diagnostic characteristic</b> | <b>1% PD-L1 threshold value</b> | <b>95% CI</b>    | <b>≥5% PD-L1 threshold value</b> | <b>95% CI</b>    | <b>≥25% PD-L1 threshold value</b> | <b>95% CI</b>    |
|----------------------------------|---------------------------------|------------------|----------------------------------|------------------|-----------------------------------|------------------|
| Sensitivity                      | 73.04%                          | 66.4% to 79%     | 52.59%                           | 45.95% to 59.16% | 87.10%                            | 70.17% to 96.37% |
| Specificity                      | 39.62%                          | 36.18% to 43.14% | 70.41 %                          | 67.31% to 73.38% | 51.37 %                           | 42.97% to 59.72% |
| Positive predictive value        | 1.21                            | 1.09 to 1.34     | 1.78                             | 1.52 to 2.08     | 1.79                              | 1.44 to 2.22     |
| Negative predictive value        | 0.68                            | 0.53 to 0.87     | 0.67                             | 0.58 to 0.78     | 0.25                              | 0.10 to 0.64     |
